# Supplementary material for: Thermally activated delayed fluorescence vs. room temperature phosphorescence by conformation control of organic single molecules
Source: Royal Society of Chemistry journal article supplement (doi:10.1039/c9tc00909d), 2019-01-01
Supplement: c9tc00909d1.pdf [file c9tc00909d1.pdf]

## *Supporting information*

### ***Thermally Activated Delayed Fluorescence vs Room Temperature Phosphorescence by Conformation Control of Organic Single Molecules***

Przemyslaw Data<sup>a,b,c\*</sup>, Masato Okazaki,<sup>d</sup> Satoshi Minakata<sup>d</sup> and Youhei Takeda<sup>d,\*</sup>

a. Faculty of Chemistry, Silesian University of Technology, Ks. M. Strzody 9, 44-100 Gliwice, Poland

b. Cardinal Stefan Wyszyński University in Warsaw, Faculty of Mathematics and

c. Centre of Polymer and Carbon Materials, Polish Academy of Sciences, M. Curie-Skłodowskiej 34, 41-819 Zabrze, Poland

d. Department of Applied Chemistry, Graduate School of Engineering, Osaka University, Yamdaoka 2-1, Suita, Osaka 565-0871, Japan

e-mail: Przemyslaw.Data@polsl.pl; takeda@chem.eng.osaka-u.ac.jp

| <b>Contents</b>                                                                                                        | <b>Page</b> |
|------------------------------------------------------------------------------------------------------------------------|-------------|
| S1 – Additional time-resolved data of 1_Y (ax-ax)                                                                      | S2          |
| S2 – Additional time-resolved data of 10% PTZDBPHZ in CBP film deposited from different solvents                       | S3          |
| S3 – Additional photoluminescence transient decay curves of 10% PTZDBPHZ in CBP film deposited from different solvents | S4          |

## S1 – Additional time-resolved data of 1\_Y (ax-ax)

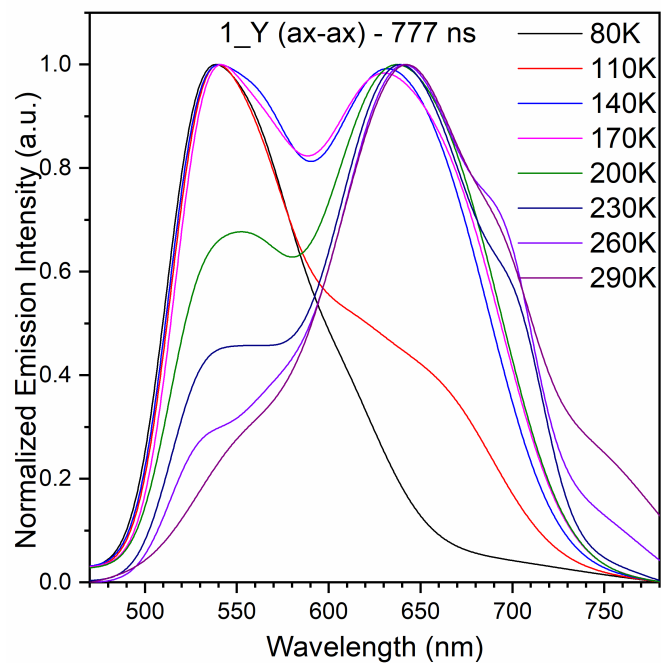

**Figure S1.** Time-resolved photoluminescence spectra of 1\_Y (ax-ax) at 777 ns delayed time during measurement at different temperatures

**S2 – Additional time-resolved data of 10% PTZDBPHZ in CBP film deposited from different solvents**

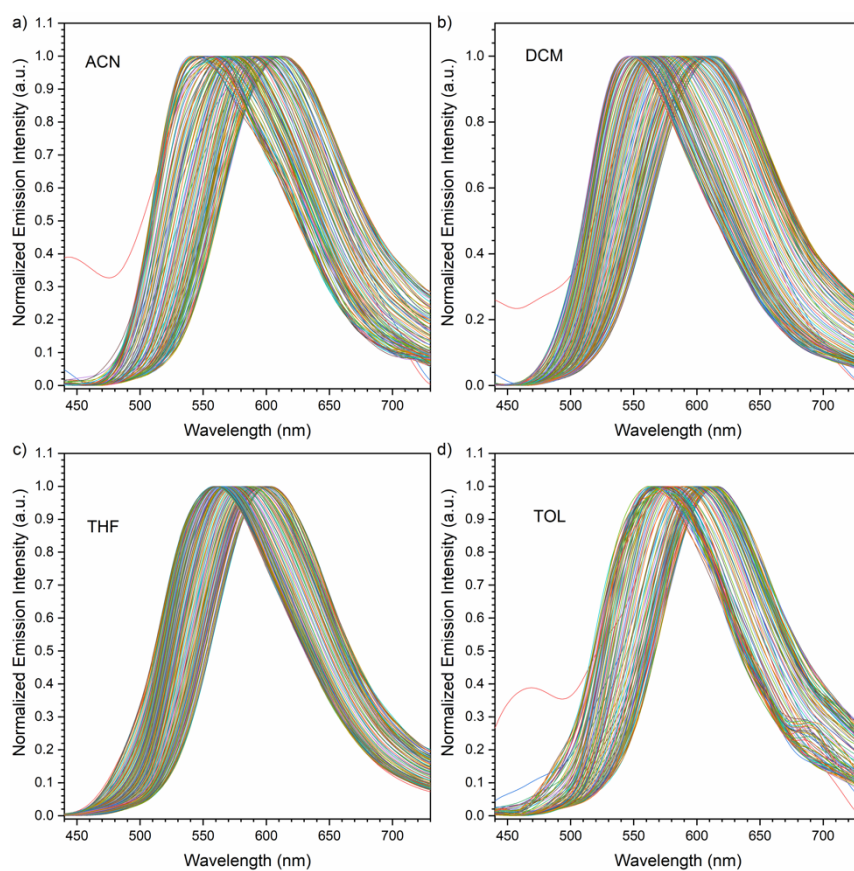

**Figure S2.** Photoluminescence curves of 10% PTZDBPHZ in CBP film deposited from different solvents

**S3 – Additional photoluminescence transient decay curves of 10% PTZDBPHZ in CBP film deposited from different solvents**

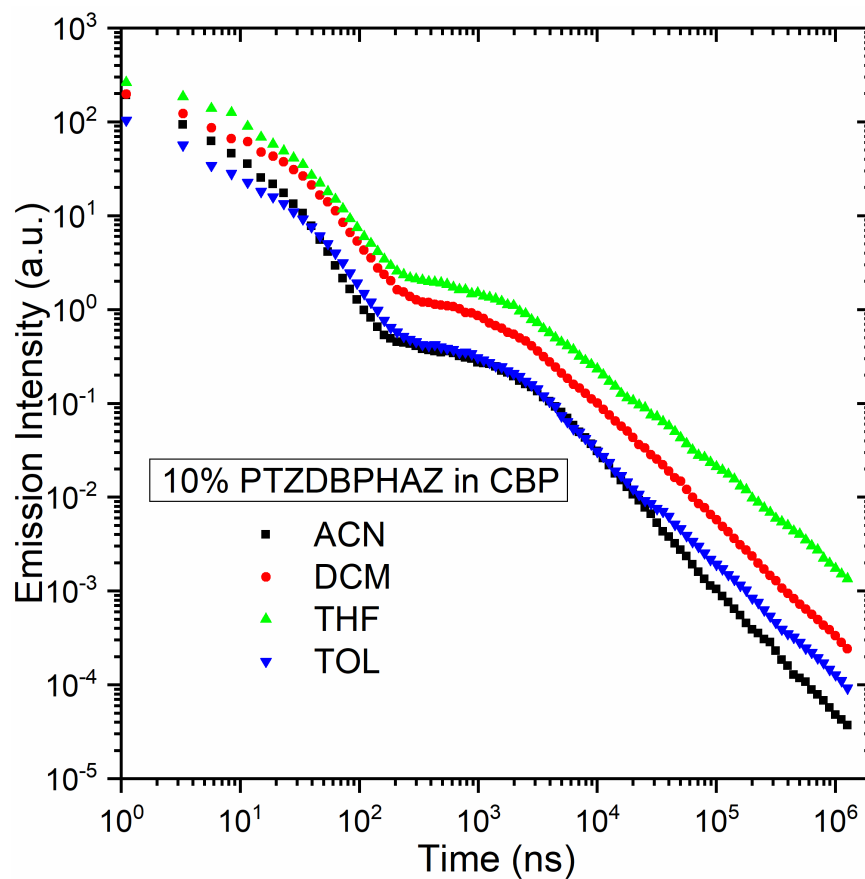

**Figure S3.** Transient decay curves of 10% PTZDBPHZ in CBP film deposited from different solvents
